# Supplementary material for: Advanced Smartphone-Based Sensing with Open-Source Task Automation
Source: PubMed Central journal article supplement (PMC6111588; doi:10.3390/s18082456), 2018-07-29

**Supporting information for article:**

**Advanced smartphone-based sensing with open-source task automation**

**Maximilian Ueberham <sup>1\*</sup>, Florian Schmidt <sup>2</sup> and Uwe Schlink <sup>1</sup>.**

<sup>1</sup> Department of Urban and Environmental Sociology, Helmholtz Centre for Environmental Research – UFZ, , 04318 Leipzig, Germany; E-Mails: maximilian.ueberham@ufz.de; uwe.schlink@ufz.de

<sup>2</sup> LeanERA GmbH, 04109 Leipzig, Germany; florianschmidt2207@gmail.com

\* Correspondence: maximilian.ueberham@ufz.de; Tel.: +49-341-235-1740

**2 pages with 1 figure**

Figure SI-1: Flowchart of script for task automation

Figure SI-2: Smartphone screenshots

**Figure SI-1: Script flowchart (Start-Flow and Stop-Flow)**

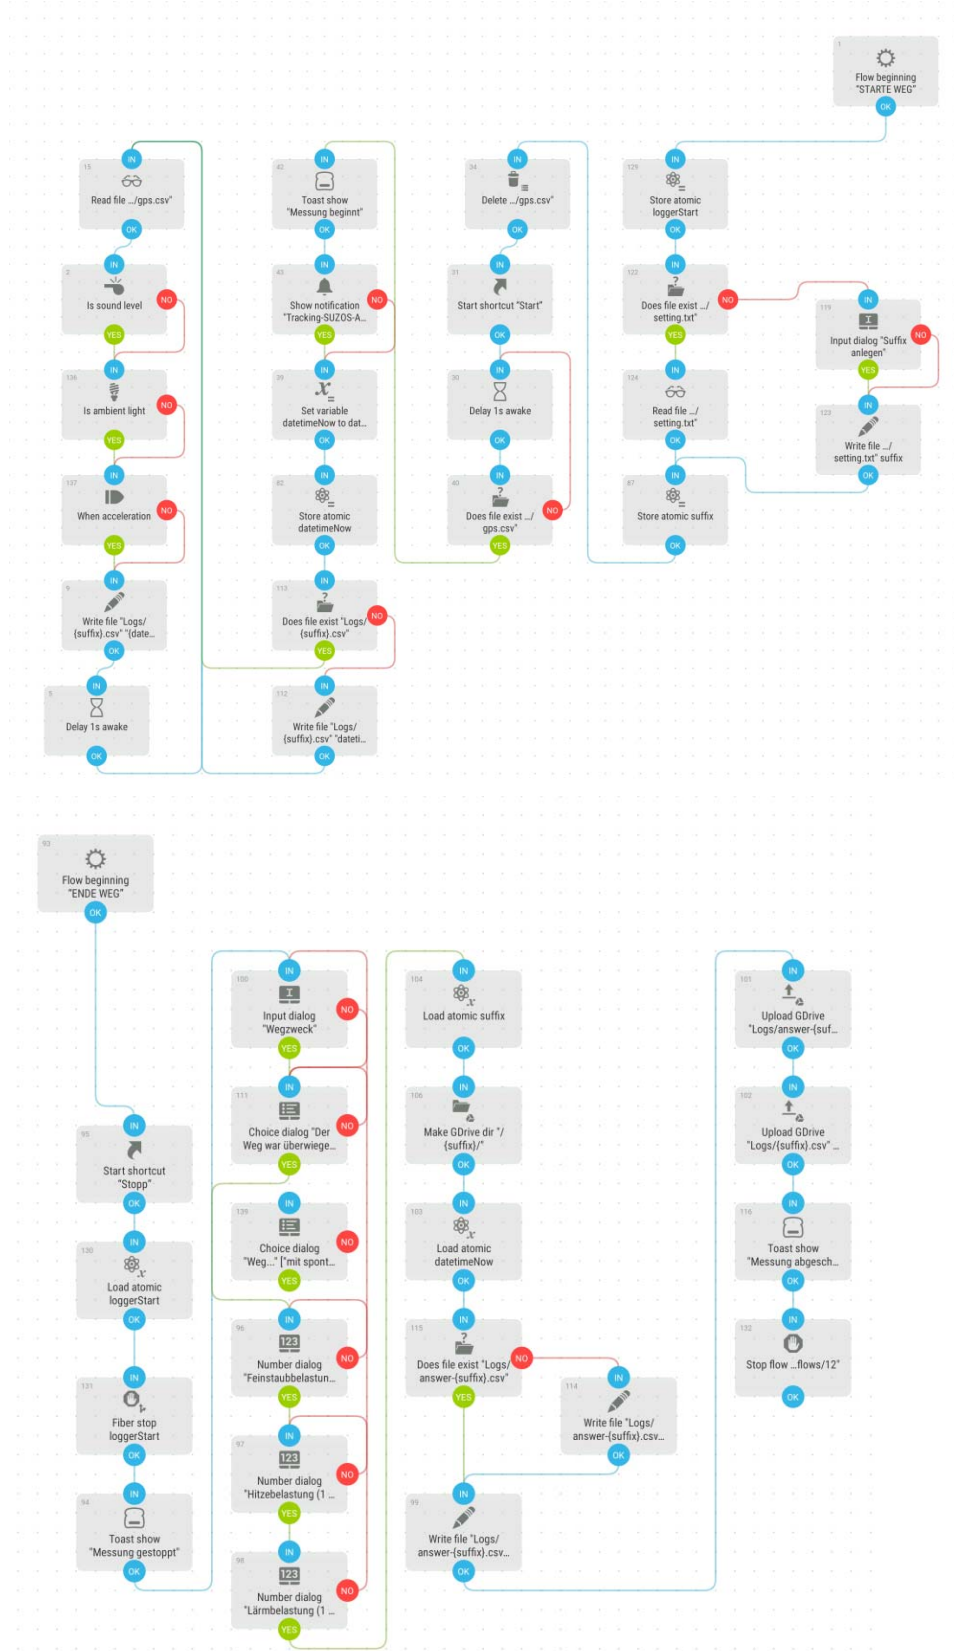

**Figure SI-2:** Smartphone screenshots (a: home screen with start and stop widget, b: screen dialog “route purpose”, c: rating request “perceived noise exposure”)

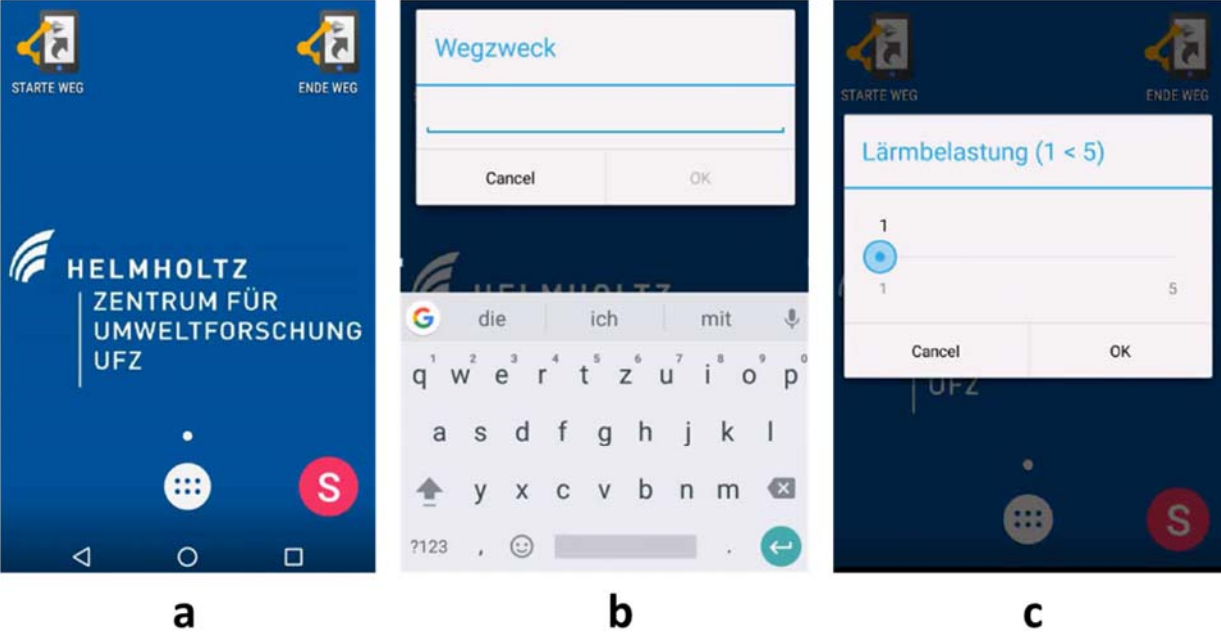

Supplement: sensors-18-02456-s001.pdf [file sensors-18-02456-s001.pdf]
